# Supplementary material for: Modulation of Cellular Circadian Rhythms by Secondary Metabolites of Lichens
Source: PubMed Central journal article supplement (PMC9260025; doi:10.3389/fncel.2022.907308), 2022-06-23
Supplement: Data_Sheet_1.pdf [file Data_Sheet_1.pdf]

SUPPLEMENTARY FIGURES

## N44-BL cells

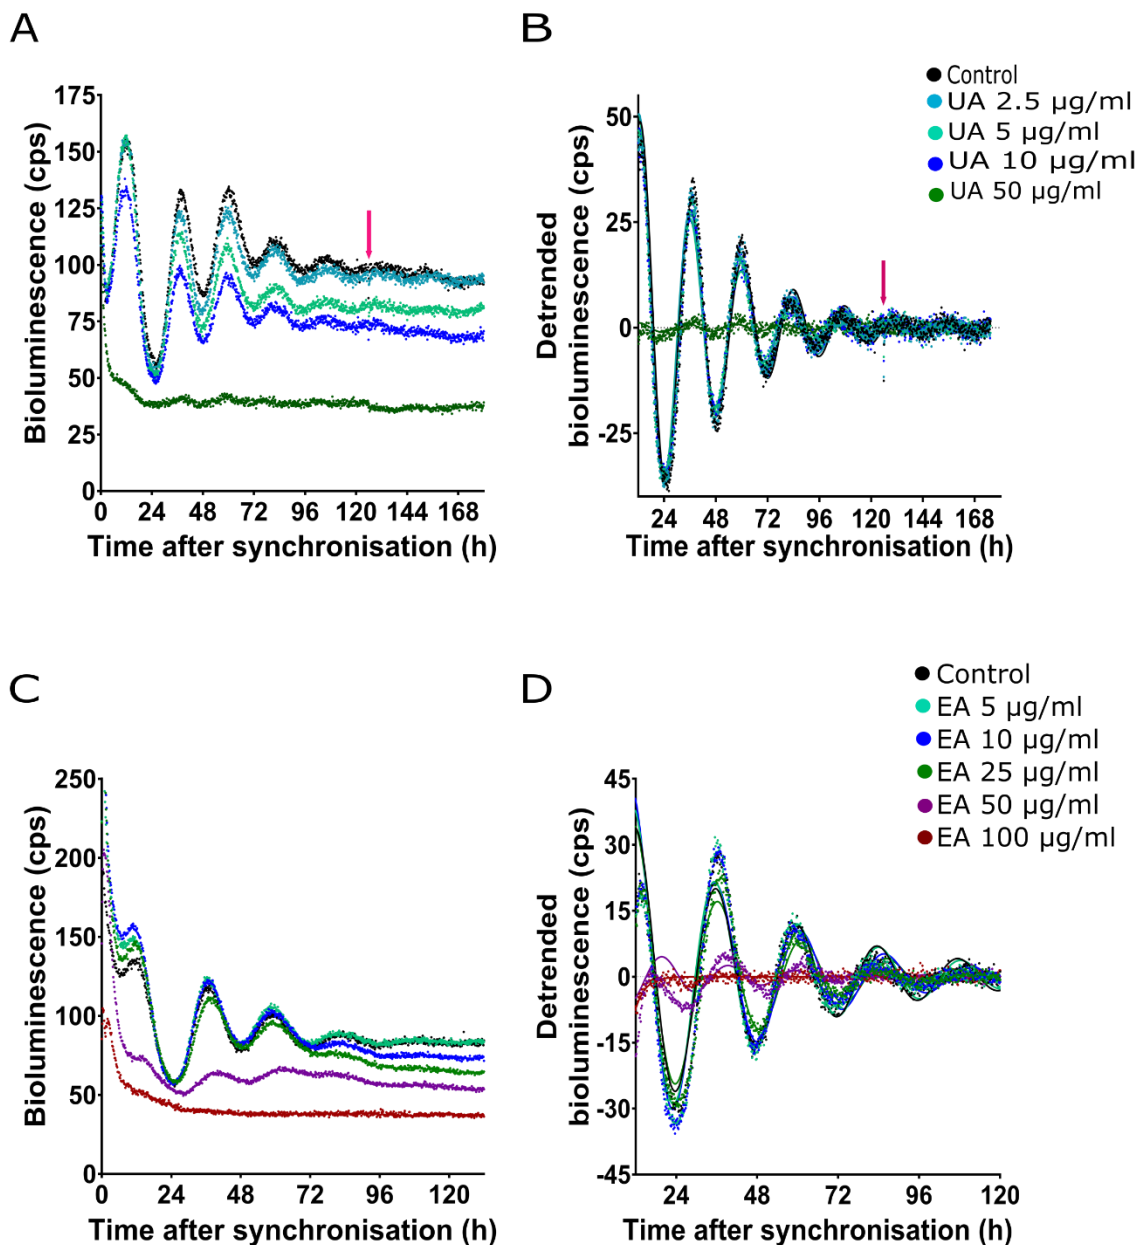

**FIGURE S1 | Lichenized secondary metabolite's dose effects and resynchronization changes in N44-BL cells.** (A, B) Representative raw (A) and representative curve fits (B) of *Bmall:luc* luminescence rhythms and resynchronization effects of different concentrations of UA treatment on N44 cells. (C, D) Representative raw (C) and representative curve fits (D) of *Bmall:luc* luminescence rhythms upon treatment with different concentrations of EA on N44 cells.

# Phase Response Curve

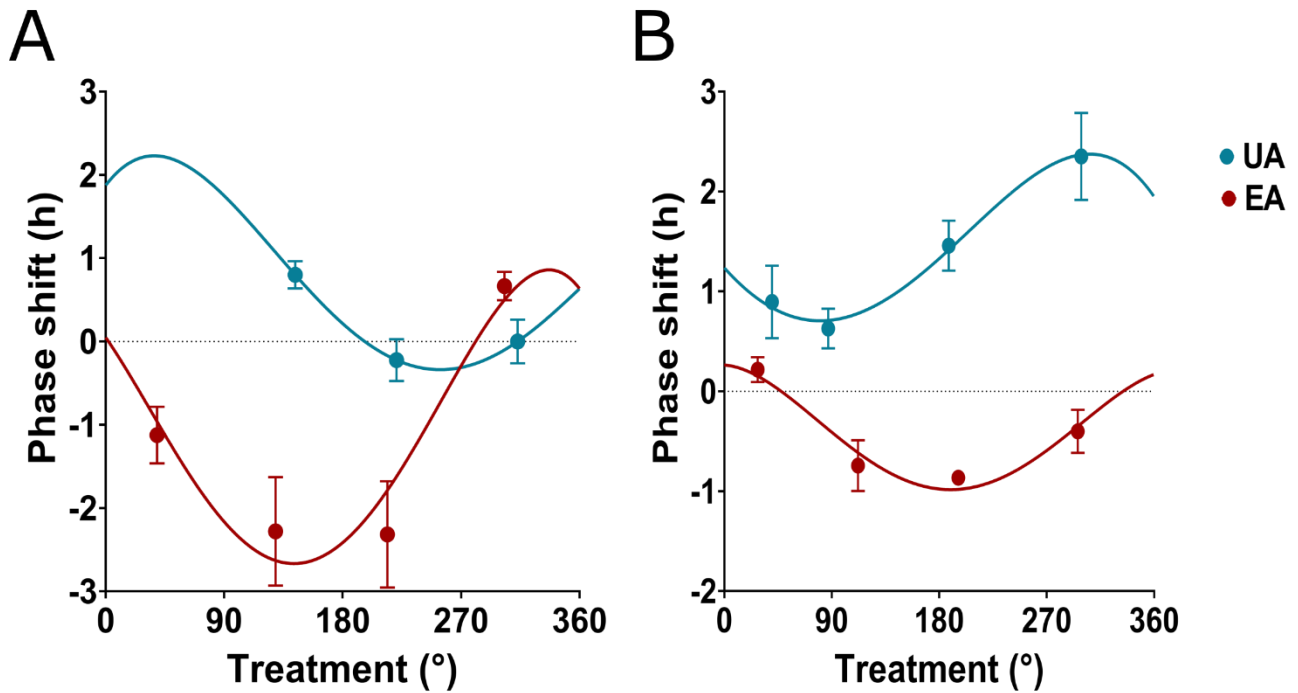

**FIGURE S2 | Phase response curves (PRCs) of N44 and U2OS *Bmal1:luc* rhythms after timed treatment with secondary lichen metabolites. PRC of the N44 cells (A) and the U2OS cells (B) treated with UA (blue) or EA (red) against solvent control (PBS/ DMSO; black) at different degrees of the *Bmal1:luc* rhythm (n = 3 per time point; data are averages  $\pm$  SEM).**
